# Supplementary material
Source: publisher figshare collection journal article supplement (https://frontiersin.figshare.com/ndownloader/files/16576976)
Supplement: Supplementary file [file 16576976]

## *Supplementary Material*

### **Fabrication of 2D Hetero-complexes with Nucleic-acid-base Adenine and Fatty-acid Stearic Acid at Liquid/solid Interface**

**Huiling Zhao<sup>1,2</sup>, Qian Yang<sup>2</sup>, Zegao Wang<sup>2,3</sup>, Hang Zhao<sup>4</sup>, Bo Liu<sup>1\*</sup> Qianming Chen<sup>4</sup> and Mingdong Dong<sup>2\*</sup>**

<sup>1</sup> School of Physics and Electronics, Henan University, Kaifeng, 475004, China.

<sup>2</sup> Interdisciplinary Nanoscience Centre (iNANO), Sino-Danish Center for Education and Research (SDC), Aarhus University, DK-8000 Aarhus C, Denmark.

<sup>3</sup> College of Materials Science and Engineering, Sichuan University, Chengdu 610065, China

<sup>4</sup> State Key Laboratory of Oral Diseases, National Clinical Research Center for Oral Diseases, West China Hospital of Stomatology, Sichuan University, Chengdu, Sichuan 610041, China

**\* Correspondence:**

Bo Liu and Mingdong Dong

[boliu@henu.edu.cn](mailto:boliu@henu.edu.cn); [dong@inano.au.dk](mailto:dong@inano.au.dk).

#### **1.1 Supplementary Figures**

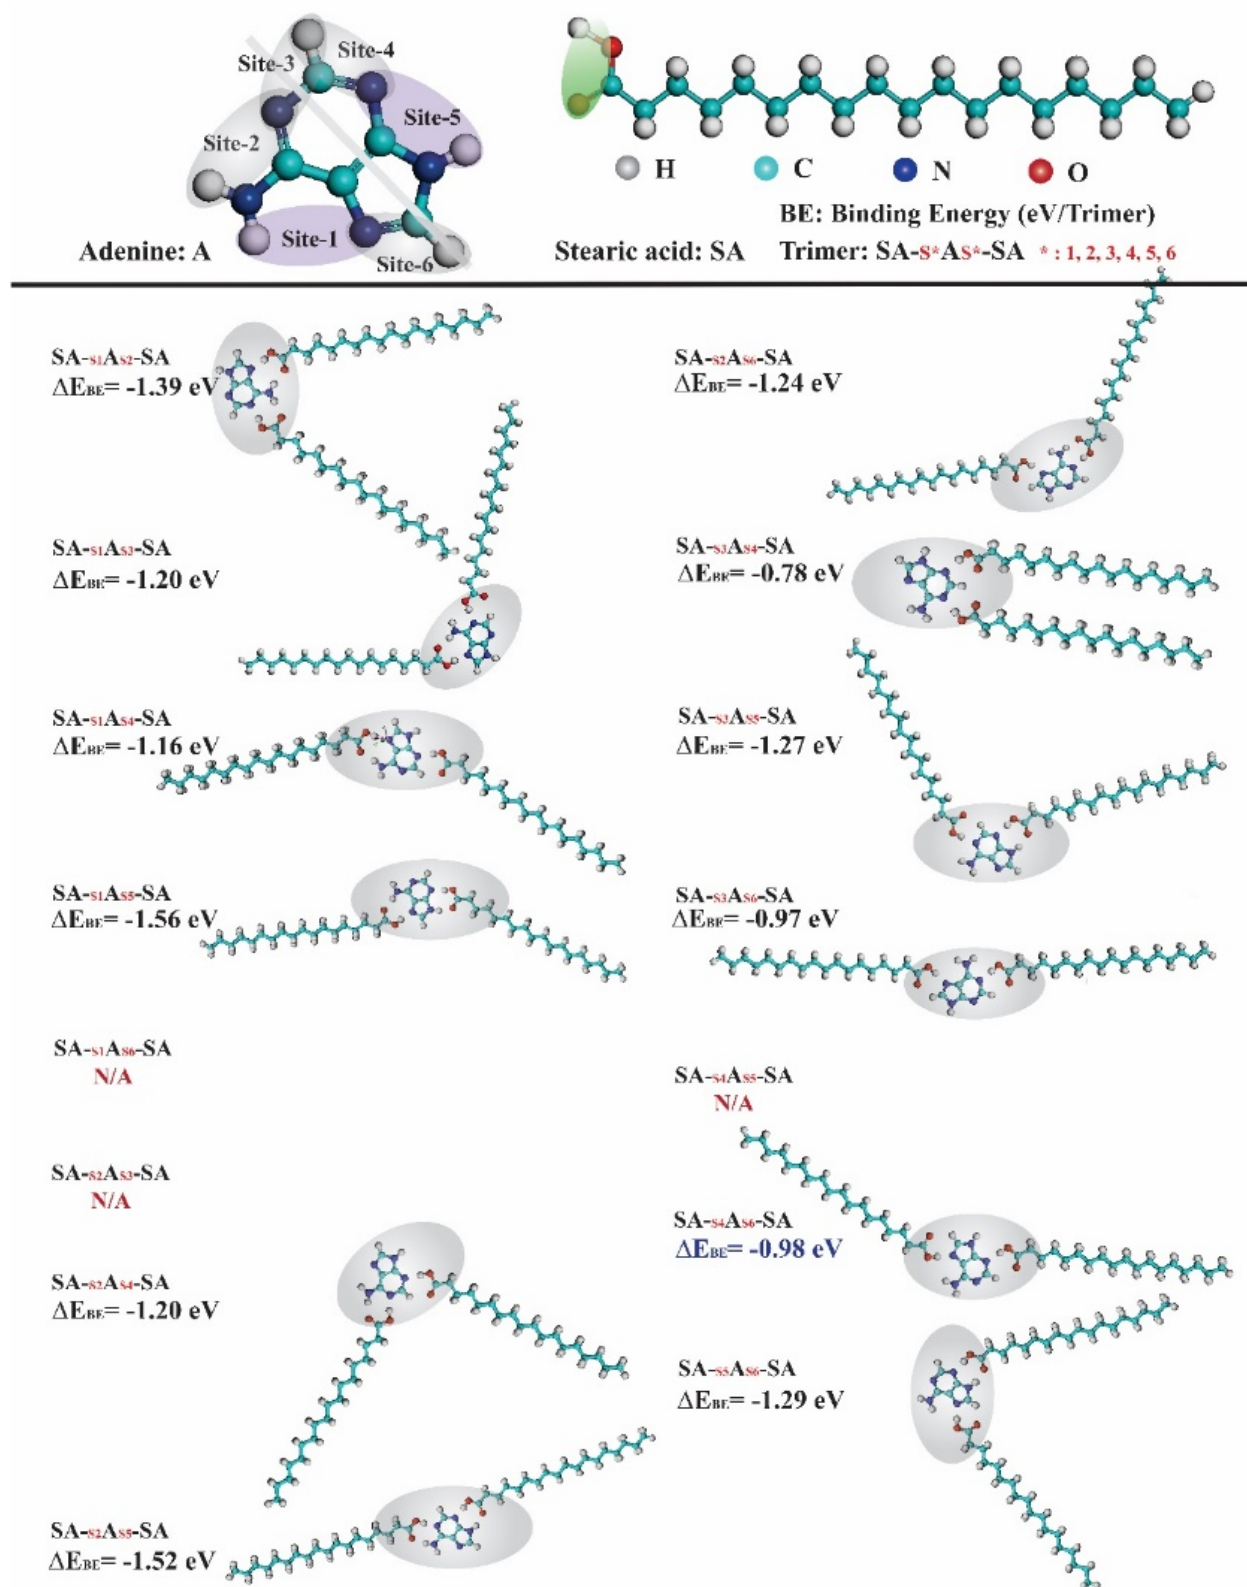

**Supplementary Figure 1.** Top images: Chemical structures of two kinds of assembled molecules: stearic acid (SA) and adenine (A). Down images: all models of SA-A-SA trimers and their corresponding binding energies derived from theoretical calculations.

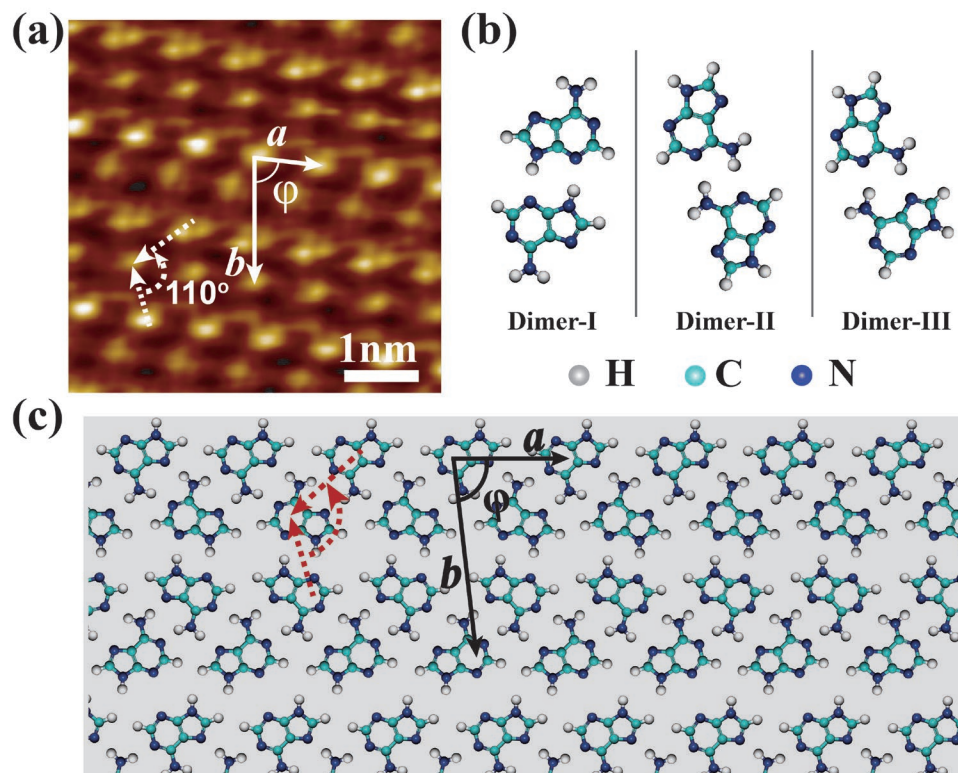

**Supplementary Figure 2.** (a) STM image of the assembled structure formed by pure adenine (A) system. (b) Three kinds of theoretical models for the A-A dimer formed by hydrogen-bonding interaction. (c) Theoretical model for the linear assembled structure originated from Dimer-III.

|                | <b>a</b>           | <b>b</b>           | <b><math>\phi</math></b> | <b>Trimer angle</b>           |
|----------------|--------------------|--------------------|--------------------------|-------------------------------|
| <b>SA-SA</b>   | $4.43 \pm 0.20$ nm | $0.82 \pm 0.20$ nm | $80.0^\circ \pm 2^\circ$ | <b><math>180^\circ</math></b> |
| <b>A-A</b>     | $0.80 \pm 0.1$ nm  | $2.20 \pm 0.2$ nm  | $76.0^\circ \pm 2^\circ$ | <b><math>110^\circ</math></b> |
| <b>SA-A-SA</b> | $6.43 \pm 0.20$ nm | $1.12 \pm 0.20$ nm | $89.8^\circ \pm 2^\circ$ | <b><math>140^\circ</math></b> |

**Supplementary Table 1.** The parameter values for three kinds of assembled unit cells marked in their STM images and corresponding theoretical models in Figures 1(b)(c), Figures 2(b)(c) and Supplementary Figures 2(b)(c).
